# Supplementary material for: Life cycle assessment of European anchovy (Engraulis encrasicolus) landed by purse seine vessels in northern Spain
Source: Springer Nature journal article supplement (doi:10.1007/s11367-017-1318-7), 2017-04-13
Supplement: MOESM1 [file 12222792]

Challenges and best practice in LCAs of seafood and other aquatic products

**Life cycle assessment of European anchovy (Engraulis encrasicolus) landed by purse seine vessels in northern Spain**

Jara Laso1 • Ian Vázquez-Rowe2 • María Margallo1 • Rosa M. Crujeiras3 • Ángel Irabien1 • Rubén Aldaco1

Received: 9 November 2016 / Accepted: 29 March 2017

© Springer-Verlag Berlin Heidelberg 2017

Responsible editor: Patrik John Gustav Henriksson

1Department of Chemical and Biomolecular Engineering, University of Cantabria, Avda. de los Castros s/n, 39005, Santander, Spain

2 Peruvian LCA Network, Department of Engineering, Pontificia Universidad Católica del Perú, Av. Universitaria 1801, San Miguel, Lima, Peru

3Department of Statistics, Mathematical Analysis and Optimization, Faculty of Mathematics, Universidade de Santiago de Compostela, Campus Sur s/n, C.P. 15782, Santiago de Compostela, Spain

 Jara Laso

[jara.laso@unican.es](mailto:jara.laso@unican.es)

**Contents:**

**Section S1 – The electricity sector in Spain**

………. p.S2

**Table S1.** Spanish electricity mix in 2013.

………. p.S2

**Section S2 – Relative contribution to impact categories of the anchovy purse seining fishery**

………. p.S3

**Figure S2.** Relative contribution to environmental impacts associated with the Cantabrian purse seining anchovy fishery.

………. p.S3

**Section S3 – Statistical analysis**

………. p.S4

**Figure S1.** Histogram of GWP of the entire sample

………. p.S4

**Figure S2.** Histogram of two groups: cut-off point at 1.46 kg CO2 equivalent.

………. p.S4

**Figure S3.** Histogram of two groups: cut-off point at 1.50 kg CO2 equivalent.

………. p.S5

**Table S2.** Results from statistical tests.

………. p.S5

**Section S4. Life cycle inventory assessment**

………. p.S6

Table S4. Life cycle questionnaire

………. p.S6

**Section S1 – The electricity sector in Spain**

**Table S1.** Spanish electricity mix in 2013.

|  | **Percentage** |
| --- | --- |
| Nuclear | 21.5 % |
| Wind | 20.7 % |
| Carbon | 14.6 % |
| Hydraulic | 13.7 % |
| Co-generation | 12.7 % |
| Fuel/Gas | 10.0 % |
| Photovoltaic | 3.2 % |
| Biomass | 2 % |
| Thermo-solar | 1.6 % |

**Section S2 – Relative contribution to impact categories of the anchovy purse seining fishery**


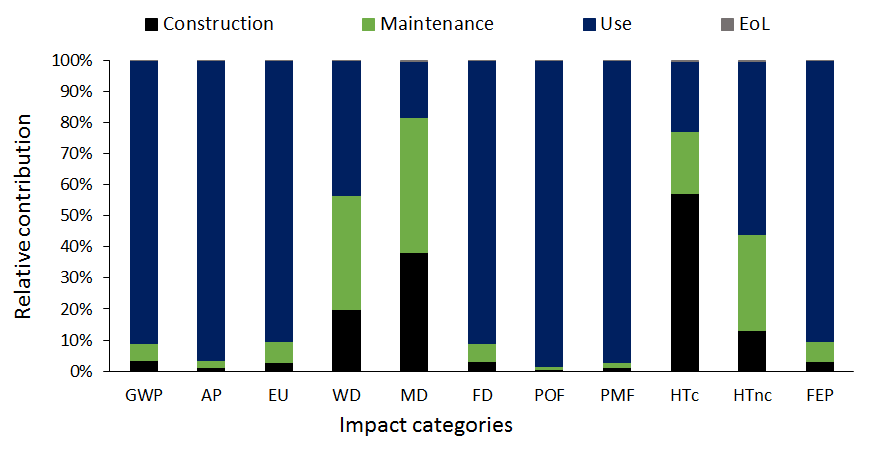


**Figure S2.** Relative contribution to environmental impacts associated with the Cantabrian purse seining anchovy fishery. GWP: global warming potential; AP: acidification potential; EU: eutrophication; WD: water depletion; MD: metal depletion; FD: fossil depletion; POF: photochemical ozone formation; PMF: particulate matter formation; HTc: human toxicity, cancer; HTnc: human toxicity, non-cancer; FEP: freshwater ecotoxicity potential.

**Section S3 – Statistical analysis**


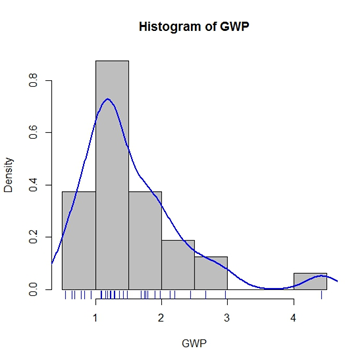


**Figure S1.** Histogram of GWP of the entire sample


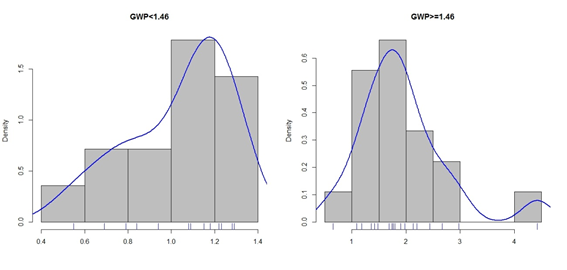


**Figure S2.** Histogram of two groups: cut-off point at 1.46 kg CO2 equivalent.


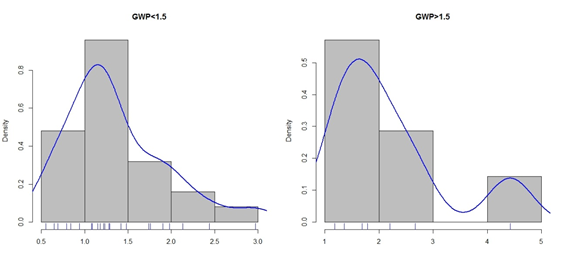


**Figure S3.** Histogram of two groups: cut-off point at 1.50 kg CO2 equivalent.

**Table S2.** Results from statistical tests.

|  | **p-values** |
| --- | --- |
| Shapiro-Wilk test (Group 1) | 0.09213 |
| Shapiro-Wilk test (Group 2) | 0.05141 |
| Levene test | 0.0218 |
| ANOVA test | 0.0001242 |
| U Mann-Whitney test | 0.0001341 |

**Section S4. Life cycle inventory assessment**

**Table S4.** Life cycle questionnaire

| **Inventoried category** | **Unit** | **Value** | **Comments** |
| --- | --- | --- | --- |
| *GENERAL DATA* | | | |
| Port |  |  |  |
| Fishing zone |  |  |  |
| Fishing gear |  |  |  |
| *FISHING NETS DATA* | | | |
| Number of nets |  |  |  |
| Materials |  |  |  |
| Length | m |  |  |
| Height | m |  |  |
| Mesh network | mm |  |  |
| *SPECIES CAPTURED* | | | |
| Anchovy | kg/year |  |  |
| Other | kg/year |  |  |
| Discards | kg/year |  |  |
| *VESSELS DATA* | | | |
| Age |  |  |  |
| Material |  |  |  |
| Dimensions | Overall length (m) |  |  |
| Width (m) |  |  |
| Capacity | t |  |  |
| Crew members |  |  |  |
| Lifespan | years |  |  |
| Operating time | years or months |  |  |
| Maintenance time | years of months |  |  |
| Operating days per year | days |  |  |
| Distance to fishing zone | miles |  |  |
| Type of fuel |  |  |  |
| Fuel consumption | | | |
| Main engine | L/year |  |  |
| Auxiliary engines | L/year |  |  |
| Lubricant oil | L/year |  |  |
| Main engine | Type |  |  |
| Power (CV) |  |  |
| Auxiliary engines | Type |  |  |
| Power (CV) |  |  |
| Ice | t/year |  |  |
| Boat paint | Type |  |  |
| L/year |  |  |
